# Supplementary material for: Sunlight driven photocatalytic degradation of organic pollutants using a MnV2O6/BiVO4 heterojunction: mechanistic perception and degradation pathways
Source: Royal Society of Chemistry journal article supplement (doi:10.1039/d1na00499a), 2021-01-01
Supplement: d1na00499a1.pdf [file d1na00499a1.pdf]

**Sunlight driven photocatalytic degradation of organic pollutants using  
MnV<sub>2</sub>O<sub>6</sub>/BiVO<sub>4</sub> heterojunction: Mechanistic perception and degradation  
pathways**

Karina Bano<sup>a</sup>, Susheel K. Mittal<sup>b</sup>, Prit Pal Singh<sup>a\*</sup>, Sandeep Kaushal<sup>a\*</sup>

<sup>a</sup> Department of Chemistry, Sri Guru Granth Sahib World University, Fatehgarh Sahib,  
Punjab, India

<sup>b</sup> School of Chemistry & Biochemistry, Thapar Institute of Engineering and Technology,

Patiala, India

Corresponding authors: [kaushalsandeep33@gmail.com](mailto:kaushalsandeep33@gmail.com); [dhillonps2003@gmail.com](mailto:dhillonps2003@gmail.com)

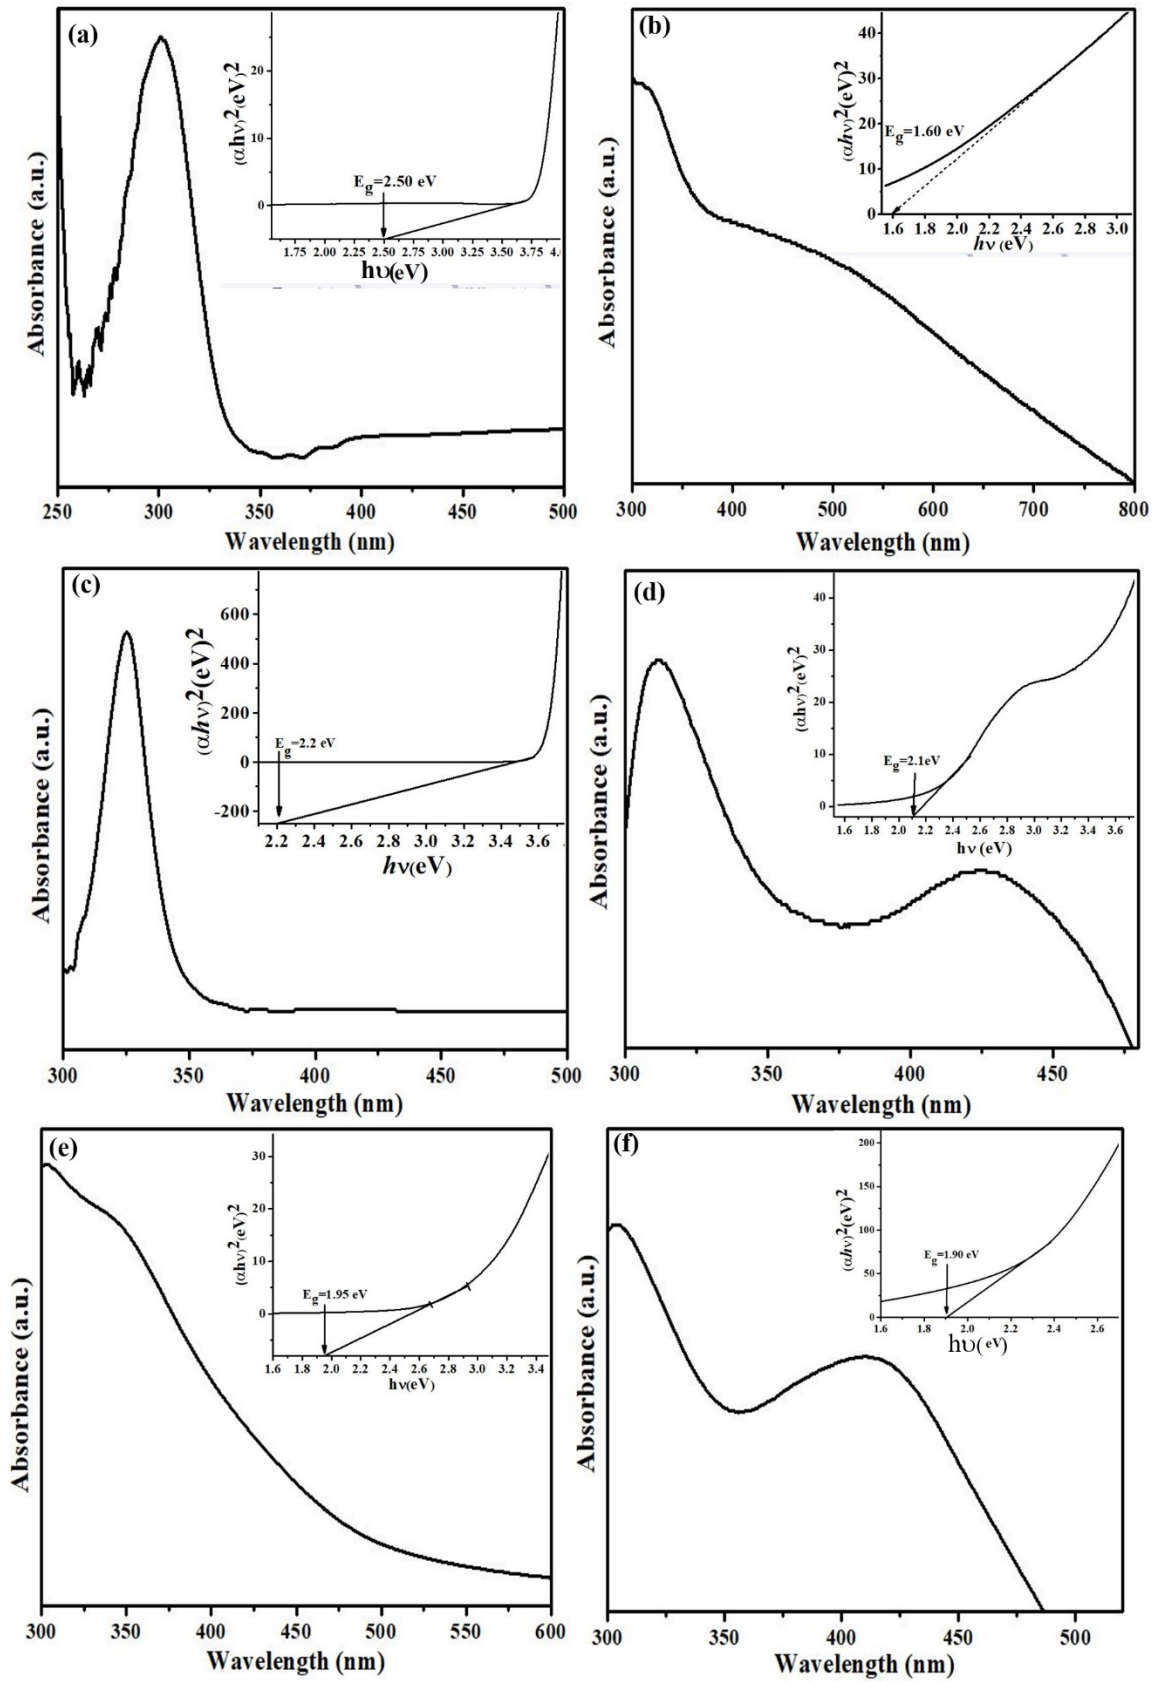

**Fig. S1:** UV-visible diffuse reflectance spectra of a) S-I; b) S-II; c) S-III; d) S-IV; e) S-V and f) S-VI (inset) Tauc plot

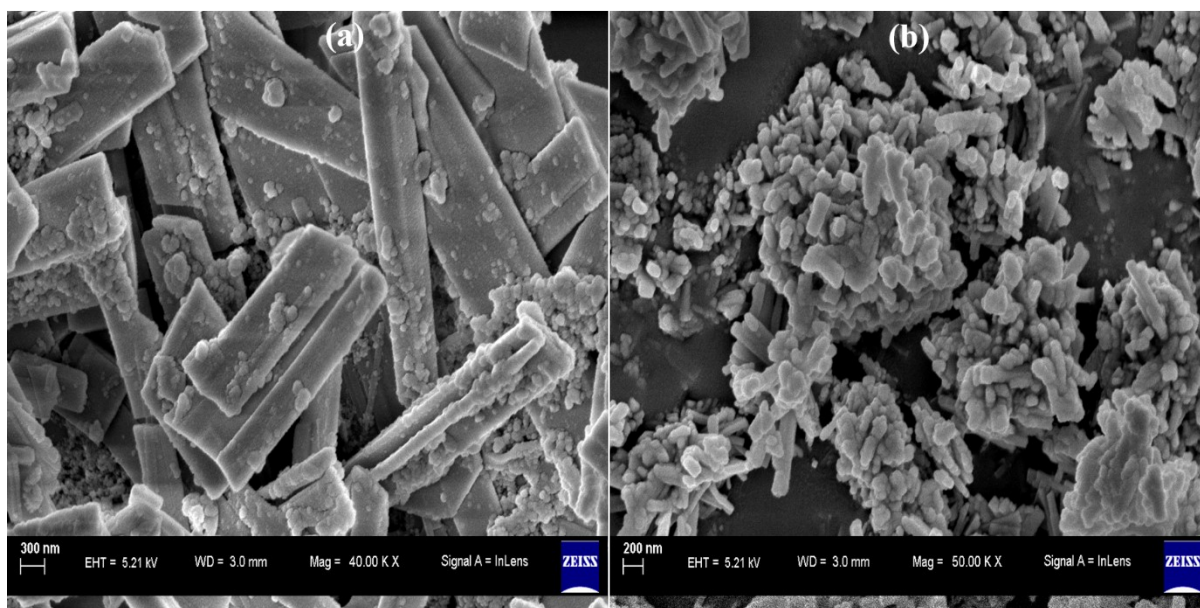

**Fig. S2:** FESEM images of pure or  $\text{BiVO}_4$  and  $\text{MnV}_2\text{O}_6$  nanoparticles

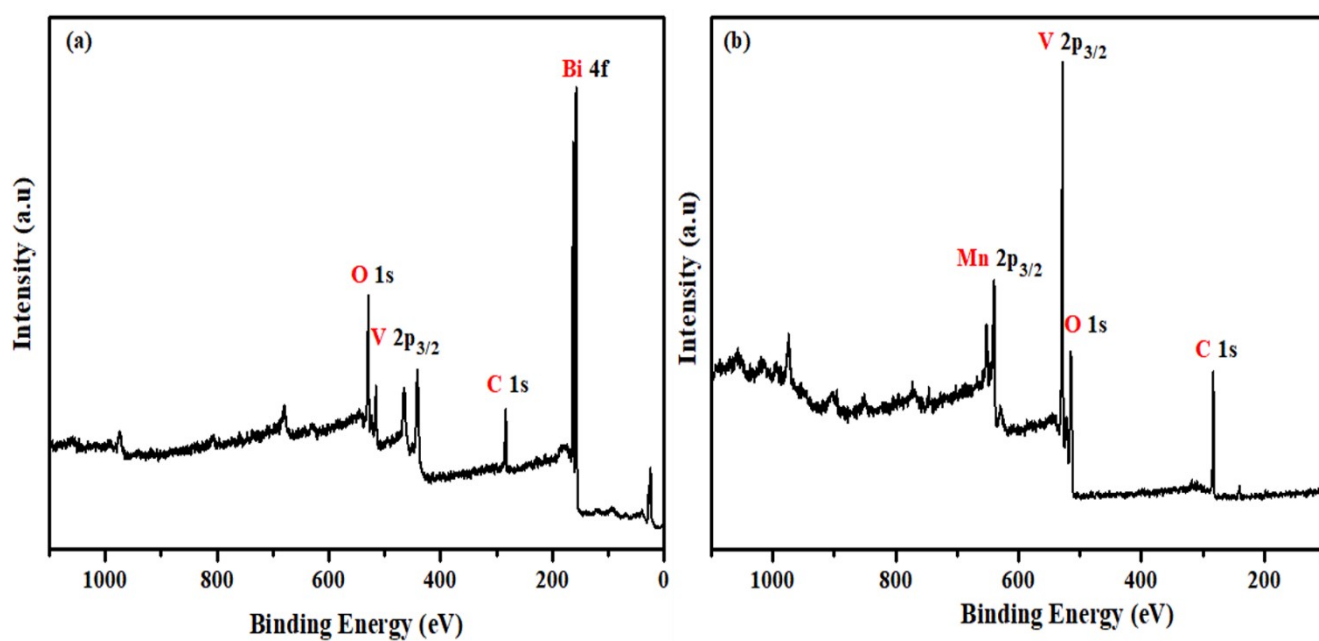

**Fig. S3:** XPS Survey spectra of pure a)  $\text{BiVO}_4$  and b)  $\text{MnV}_2\text{O}_6$  nanomaterials

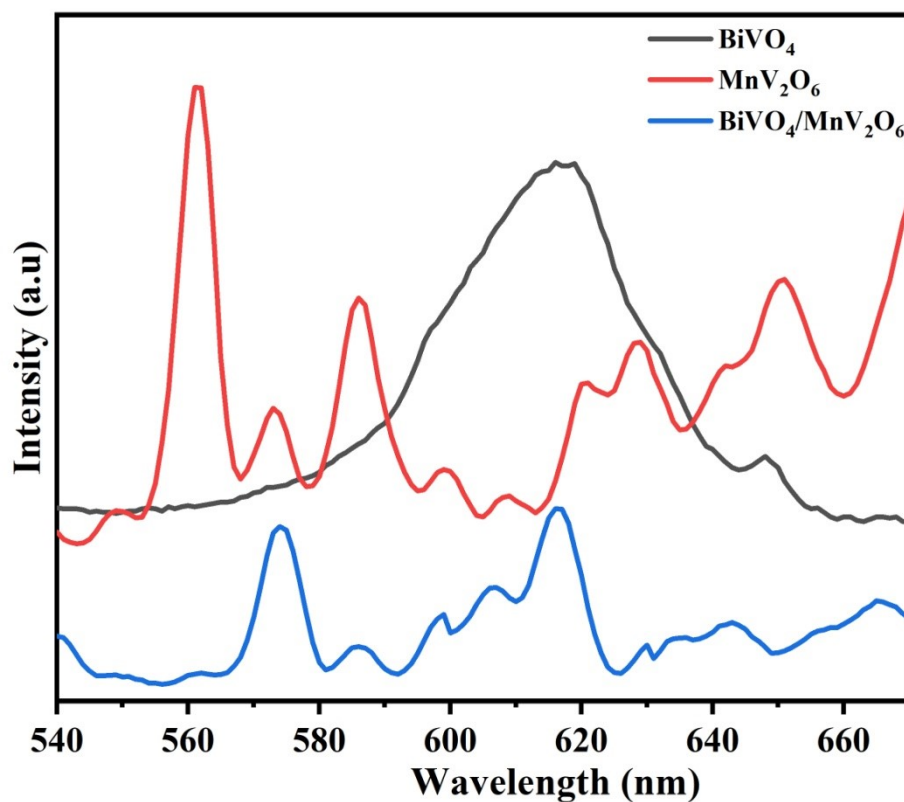

**Fig.S4:** PL spectra of as synthesized BiVO<sub>4</sub>, MnV<sub>2</sub>O<sub>6</sub> and BiVO<sub>4</sub>/MnV<sub>2</sub>O<sub>6</sub> heterojunction photocatalyst.

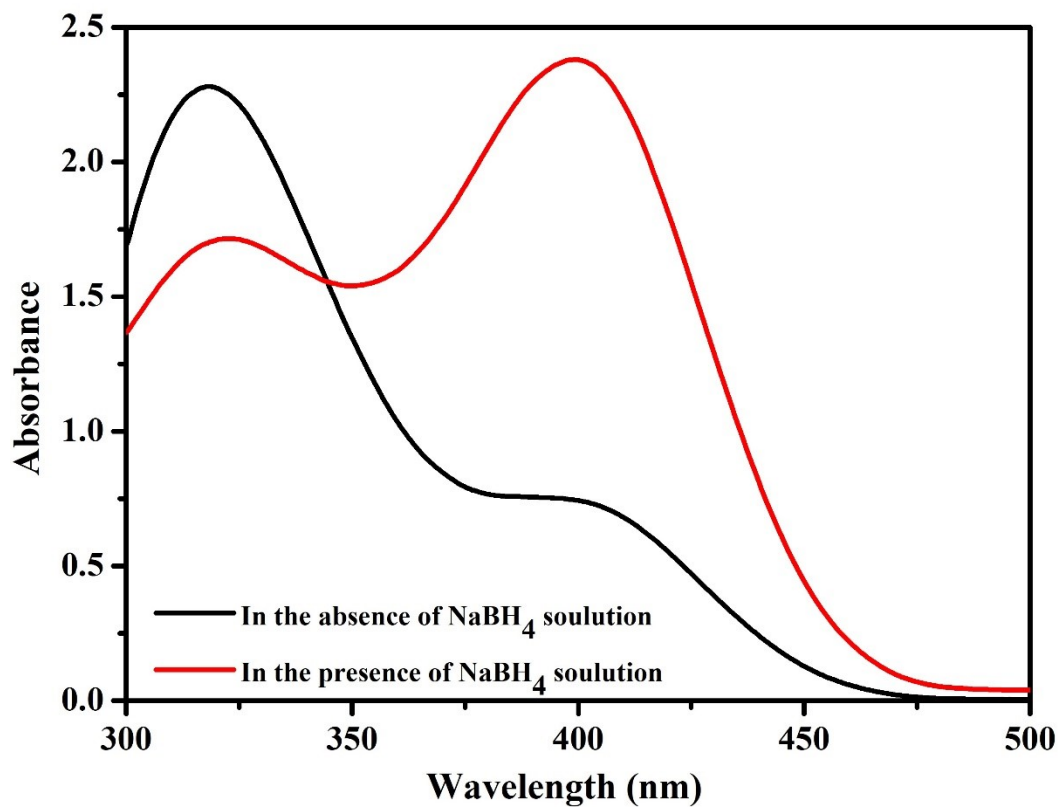

**Fig. S5:** UV-vis spectra of 4-NP before and after adding the solution of NaBH<sub>4</sub>

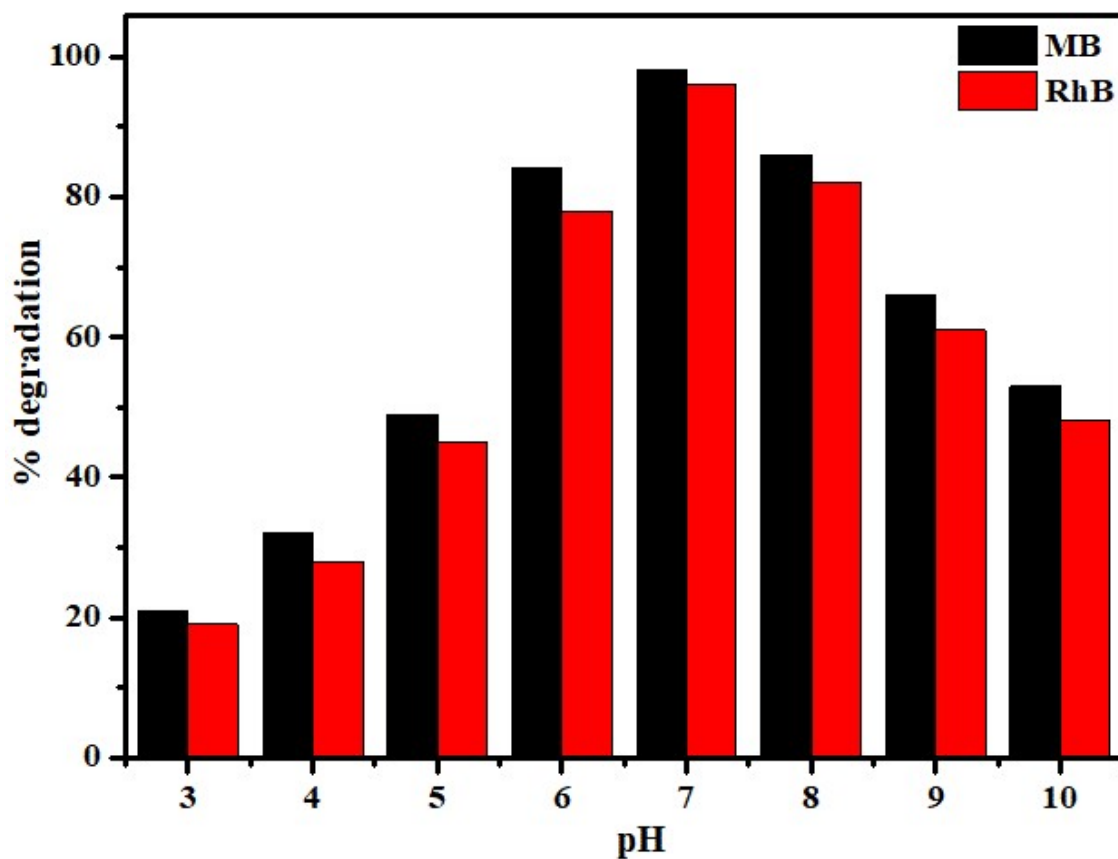

**Fig. S6:** Effect of pH on the photodegradation of MB and RhB in the presence of  $\text{MnV}_2\text{O}_6/\text{BiVO}_4$  heterojunction photocatalyst

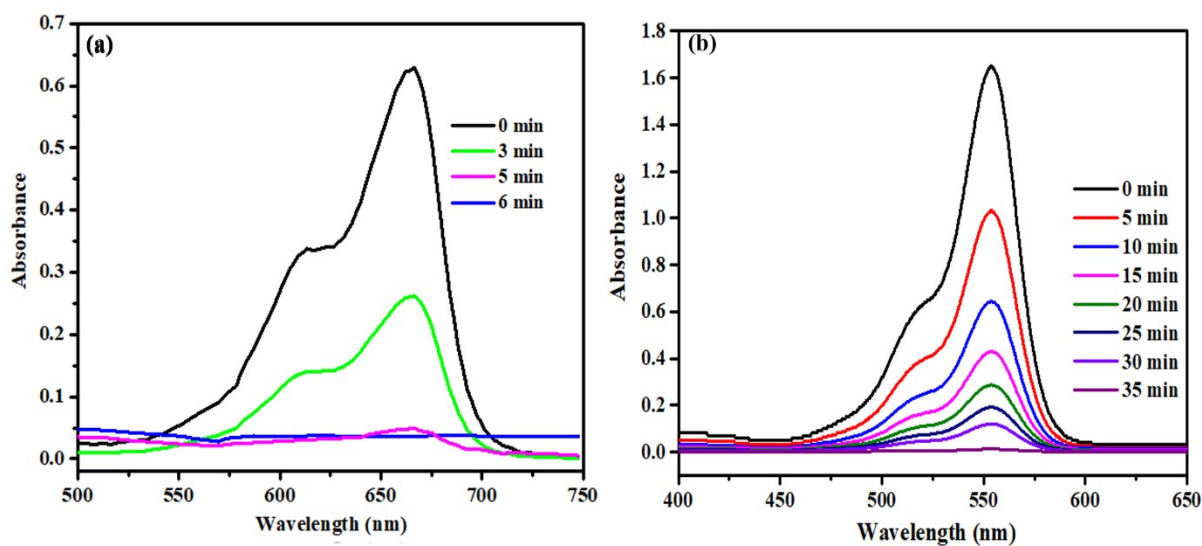

**Fig. S7:** UV-vis spectral changes of aqueous solution of a) MB and b) RhB dyes on over  $\text{MnV}_2\text{O}_6/\text{BiVO}_4$  heterojunction photocatalyst (S-V) under sunlight irradiation at different time intervals
